# Supplementary material for: Complexation between burdock holocellulose nanocrystals and corn starch: gelatinization properties, microstructure, and digestibility in vitro
Source: Royal Society of Chemistry journal article supplement (doi:10.1039/d1fo03418a), 2021-12-13
Supplement: d1fo03418a1.pdf [file d1fo03418a1.pdf]

**Complexation between burdock holocellulose nanocrystals and corn starch: gelatinization properties, microstructure, and digestibility *in vitro***

Ying Li<sup>c,a,‡</sup>, Wei Liang<sup>a,c,‡</sup>, Wuyang Huang<sup>c,a</sup>, Meigui Huang<sup>b</sup>, Jin Feng<sup>c,a,\*</sup>

<sup>a</sup> School of Food and Biological Engineering, Jiangsu University, 301 Xuefu Road, Zhenjiang 212013, China

<sup>b</sup> Department of Food Science and Engineering, College of Light Industry and Food Engineering, Nanjing Forestry University, 159 Longpan Road, Nanjing 210037, China

<sup>c</sup> Institute of Agro-product Processing, Jiangsu Academy of Agricultural Sciences, 50 Zhongling Street, Nanjing 210014, China

<sup>‡</sup> Both authors contributed equally to this work.

\* Corresponding author: Jin Feng (Address: 50 Zhongling Street, Nanjing 210014, China. Tel: +86-25-84392334; Fax: +86-25-84392334; E-mail: [fengjinzju@163.com](mailto:fengjinzju@163.com)).

**Table S1** Textural properties of CS gels in the absence or presence of 0.2 %, 0.5 %, 1.0 %, or 2.0 % (*w/w*, relative to the weight of pure CS) of burdock *hCNCs*.

| Samples                     | Cohesiveness              | Adhesiveness/g              | Chewiness/g                 |
|-----------------------------|---------------------------|-----------------------------|-----------------------------|
| Pure CS                     | 0.19 ± 0.02 <sup>a</sup>  | 249.23 ± 10.23 <sup>a</sup> | 157.32 ± 10.23 <sup>a</sup> |
| CS + 0.2 % <i>hCNC</i> -600 | 0.22 ± 0.02 <sup>a</sup>  | 277.65 ± 10.21 <sup>b</sup> | 319.52 ± 6.90 <sup>c</sup>  |
| CS + 0.5 % <i>hCNC</i> -600 | 0.21 ± 0.01 <sup>a</sup>  | 272.87 ± 4.22 <sup>b</sup>  | 280.19 ± 9.52 <sup>b</sup>  |
| CS + 1.0 % <i>hCNC</i> -600 | 0.22 ± 0.03 <sup>a</sup>  | 280.12 ± 8.32 <sup>b</sup>  | 285.43 ± 18.43 <sup>b</sup> |
| CS + 2.0 % <i>hCNC</i> -600 | 0.22 ± 0.01 <sup>a</sup>  | 278.20 ± 9.16 <sup>b</sup>  | 267.89 ± 7.34 <sup>b</sup>  |
| CS + 0.2 % <i>hCNC</i> -400 | 0.43 ± 0.03 <sup>c</sup>  | 477.09 ± 12.23 <sup>e</sup> | 514.32 ± 19.31 <sup>f</sup> |
| CS + 0.5 % <i>hCNC</i> -400 | 0.37 ± 0.02 <sup>b</sup>  | 449.33 ± 8.87 <sup>d</sup>  | 463.40 ± 8.76 <sup>d</sup>  |
| CS + 1.0 % <i>hCNC</i> -400 | 0.40 ± 0.02 <sup>bc</sup> | 512.29 ± 19.92 <sup>f</sup> | 507.52 ± 11.45 <sup>f</sup> |
| CS + 2.0 % <i>hCNC</i> -400 | 0.47 ± 0.01 <sup>d</sup>  | 537.61 ± 6.34 <sup>g</sup>  | 483.90 ± 6.78 <sup>e</sup>  |
| CS + 0.2 % <i>hCNC</i> -200 | 0.38 ± 0.01 <sup>b</sup>  | 424.07 ± 8.43 <sup>c</sup>  | 583.10 ± 15.26 <sup>g</sup> |
| CS + 0.5 % <i>hCNC</i> -200 | 0.43 ± 0.02 <sup>c</sup>  | 614.51 ± 25.55 <sup>h</sup> | 749.03 ± 31.23 <sup>h</sup> |
| CS + 1.0 % <i>hCNC</i> -200 | 0.40 ± 0.02 <sup>bc</sup> | 474.13 ± 3.98 <sup>e</sup>  | 523.98 ± 17.77 <sup>f</sup> |
| CS + 2.0 % <i>hCNC</i> -200 | 0.42 ± 0.01 <sup>bc</sup> | 454.27 ± 11.09 <sup>d</sup> | 486.01 ± 3.56 <sup>e</sup>  |

Different lowercase letters in the same column represent significant differences ( $p < 0.05$ ).

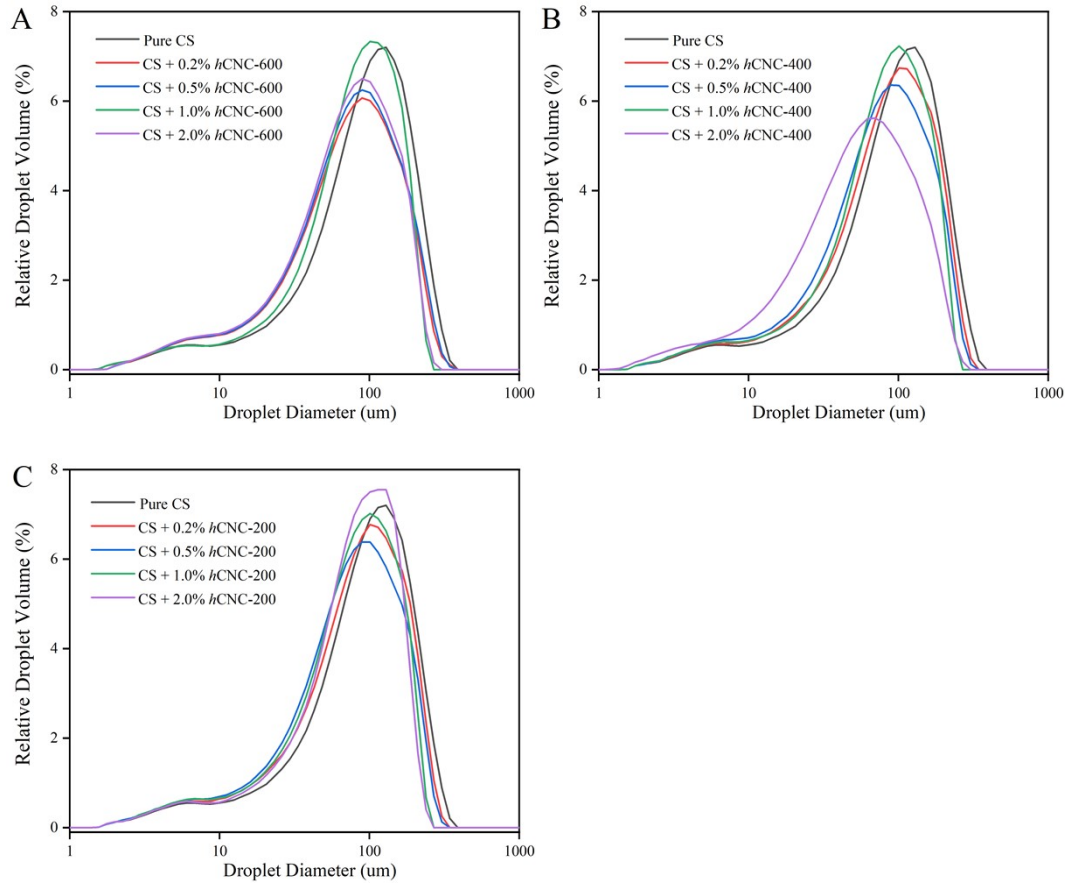

**Fig. S1.** The size distribution of pure CS gel and those containing different amounts of burdock *hCNC-600* (a), *hCNC-400* (b) or *hCNC-200* (c).

**Table S2** Particle size of CS gel after the RVA experiments in the absence or presence of 0.2 %, 0.5 %, 1.0 %, or 2.0 % (w/w, relative to the weight of pure CS) of burdock *hCNCs*.

| Samples                     | D <sub>10</sub> (μm)       | D <sub>90</sub> (μm)       | D <sub>4,3</sub> (μm)     | D <sub>3,2</sub> (μm)      | D <sub>4,3</sub> - D <sub>3,2</sub> (μm) |
|-----------------------------|----------------------------|----------------------------|---------------------------|----------------------------|------------------------------------------|
| Pure CS                     | 20.11 ± 0.17 <sup>k</sup>  | 188.33 ± 0.49 <sup>j</sup> | 99.65 ± 0.28 <sup>h</sup> | 37.78 ± 0.15 <sup>i</sup>  | 61.87 ± 0.13 <sup>k</sup>                |
| CS + 0.2 % <i>hCNC</i> -600 | 15.32 ± 0.17 <sup>e</sup>  | 179.72 ± 0.35 <sup>i</sup> | 92.81 ± 0.52 <sup>g</sup> | 31.92 ± 0.18 <sup>d</sup>  | 60.89 ± 0.34 <sup>j</sup>                |
| CS + 0.5 % <i>hCNC</i> -600 | 14.84 ± 0.05 <sup>d</sup>  | 168.12 ± 0.23 <sup>g</sup> | 81.98 ± 0.67 <sup>d</sup> | 31.06 ± 0.37 <sup>c</sup>  | 50.92 ± 0.24 <sup>e</sup>                |
| CS + 1.0 % <i>hCNC</i> -600 | 14.61 ± 0.13 <sup>c</sup>  | 156.09 ± 0.59 <sup>e</sup> | 82.22 ± 0.15 <sup>d</sup> | 32.71 ± 0.28 <sup>e</sup>  | 49.51 ± 0.06 <sup>d</sup>                |
| CS + 2.0 % <i>hCNC</i> -600 | 14.50 ± 0.08 <sup>c</sup>  | 152.81 ± 1.45 <sup>c</sup> | 76.69 ± 0.19 <sup>b</sup> | 30.33 ± 0.06 <sup>b</sup>  | 46.36 ± 0.04 <sup>b</sup>                |
| CS + 0.2 % <i>hCNC</i> -400 | 19.15 ± 0.48 <sup>j</sup>  | 175.30 ± 1.16 <sup>h</sup> | 93.10 ± 1.05 <sup>g</sup> | 36.29 ± 0.25 <sup>h</sup>  | 56.81 ± 0.83 <sup>i</sup>                |
| CS + 0.5 % <i>hCNC</i> -400 | 16.59 ± 0.06 <sup>h</sup>  | 165.66 ± 1.84 <sup>f</sup> | 89.32 ± 0.08 <sup>f</sup> | 33.35 ± 0.48 <sup>f</sup>  | 55.97 ± 0.03 <sup>h</sup>                |
| CS + 1.0 % <i>hCNC</i> -400 | 16.11 ± 0.12 <sup>fg</sup> | 156.51 ± 0.29 <sup>e</sup> | 81.93 ± 0.21 <sup>d</sup> | 32.21 ± 0.69 <sup>de</sup> | 49.72 ± 0.12 <sup>d</sup>                |
| CS + 2.0 % <i>hCNC</i> -400 | 11.52 ± 0.07 <sup>a</sup>  | 136.58 ± 0.43 <sup>a</sup> | 64.04 ± 0.27 <sup>a</sup> | 23.55 ± 1.14 <sup>a</sup>  | 40.49 ± 0.13 <sup>a</sup>                |
| CS + 0.2 % <i>hCNC</i> -200 | 17.46 ± 0.02 <sup>i</sup>  | 174.73 ± 0.25 <sup>h</sup> | 87.31 ± 0.08 <sup>e</sup> | 35.23 ± 0.05 <sup>g</sup>  | 52.08 ± 0.03 <sup>g</sup>                |
| CS + 0.5 % <i>hCNC</i> -200 | 16.22 ± 0.02 <sup>g</sup>  | 166.61 ± 0.12 <sup>f</sup> | 82.85 ± 1.05 <sup>d</sup> | 31.51 ± 0.22 <sup>c</sup>  | 51.34 ± 1.03 <sup>f</sup>                |
| CS + 1.0 % <i>hCNC</i> -200 | 16.03 ± 0.03 <sup>f</sup>  | 155.70 ± 0.15 <sup>d</sup> | 82.19 ± 0.12 <sup>d</sup> | 32.73 ± 0.05 <sup>e</sup>  | 49.46 ± 0.87 <sup>d</sup>                |
| CS + 2.0 % <i>hCNC</i> -200 | 12.41 ± 0.07 <sup>b</sup>  | 149.38 ± 0.06 <sup>b</sup> | 81.06 ± 0.09 <sup>c</sup> | 33.15 ± 0.04 <sup>f</sup>  | 47.91 ± 0.05 <sup>c</sup>                |

Different lowercase letters in the same column represent significant differences ( $p < 0.05$ ).

**Table S3** Thermodynamic parameters of pure corn starch gel and those containing 0.2 %, 0.5 %, 1.0 %, or 2.0 % (w/w, relative to the weight of pure CS) of burdock *hCNCs*.

| Samples                     | $T_o$ (°C)                | $T_p$ (°C)                | $T_c$ (°C)                 | $\Delta T$ (°C)            |
|-----------------------------|---------------------------|---------------------------|----------------------------|----------------------------|
| Pure CS                     | 66.46 ± 0.34 <sup>a</sup> | 70.51 ± 0.21 <sup>a</sup> | 80.66 ± 0.12 <sup>a</sup>  | 14.20 ± 0.23 <sup>a</sup>  |
| CS + 0.2 % <i>hCNC</i> -600 | 66.48 ± 0.15 <sup>a</sup> | 71.23 ± 0.12 <sup>b</sup> | 85.05 ± 0.29 <sup>c</sup>  | 18.57 ± 0.21 <sup>e</sup>  |
| CS + 0.5 % <i>hCNC</i> -600 | 66.88 ± 0.29 <sup>a</sup> | 71.56 ± 0.17 <sup>b</sup> | 85.19 ± 0.21 <sup>c</sup>  | 18.31 ± 1.03 <sup>e</sup>  |
| CS + 1.0 % <i>hCNC</i> -600 | 66.27 ± 1.03 <sup>a</sup> | 71.18 ± 0.25 <sup>b</sup> | 84.97 ± 0.33 <sup>c</sup>  | 18.70 ± 1.23 <sup>e</sup>  |
| CS + 2.0 % <i>hCNC</i> -600 | 66.52 ± 0.18 <sup>a</sup> | 71.21 ± 0.07 <sup>b</sup> | 84.70 ± 0.31 <sup>c</sup>  | 18.18 ± 0.43 <sup>e</sup>  |
| CS + 0.2 % <i>hCNC</i> -400 | 66.76 ± 0.23 <sup>a</sup> | 71.03 ± 0.15 <sup>b</sup> | 81.86 ± 0.22 <sup>b</sup>  | 15.10 ± 0.17 <sup>c</sup>  |
| CS + 0.5 % <i>hCNC</i> -400 | 66.83 ± 0.21 <sup>a</sup> | 71.05 ± 0.26 <sup>b</sup> | 81.88 ± 0.16 <sup>b</sup>  | 15.05 ± 0.04 <sup>c</sup>  |
| CS + 1.0 % <i>hCNC</i> -400 | 66.49 ± 0.37 <sup>a</sup> | 71.16 ± 0.31 <sup>b</sup> | 81.65 ± 0.32 <sup>b</sup>  | 15.16 ± 0.21 <sup>c</sup>  |
| CS + 2.0 % <i>hCNC</i> -400 | 66.80 ± 0.16 <sup>a</sup> | 71.41 ± 0.24 <sup>b</sup> | 82.71 ± 0.17 <sup>b</sup>  | 15.91 ± 0.34 <sup>d</sup>  |
| CS + 0.2 % <i>hCNC</i> -200 | 66.45 ± 0.45 <sup>a</sup> | 70.53 ± 0.13 <sup>a</sup> | 80.74 ± 0.22 <sup>a</sup>  | 14.29 ± 0.55 <sup>ab</sup> |
| CS + 0.5 % <i>hCNC</i> -200 | 66.41 ± 0.29 <sup>a</sup> | 70.74 ± 0.19 <sup>a</sup> | 81.20 ± 0.52 <sup>ab</sup> | 14.79 ± 0.04 <sup>b</sup>  |
| CS + 1.0 % <i>hCNC</i> -200 | 66.32 ± 0.68 <sup>a</sup> | 70.57 ± 0.10 <sup>a</sup> | 81.04 ± 0.23 <sup>ab</sup> | 14.72 ± 0.23 <sup>b</sup>  |
| CS + 2.0 % <i>hCNC</i> -200 | 66.47 ± 0.15 <sup>a</sup> | 70.61 ± 0.15 <sup>a</sup> | 81.52 ± 0.46 <sup>b</sup>  | 15.05 ± 0.19 <sup>c</sup>  |

Different lowercase letters in the same column represent significant differences ( $p < 0.05$ ).

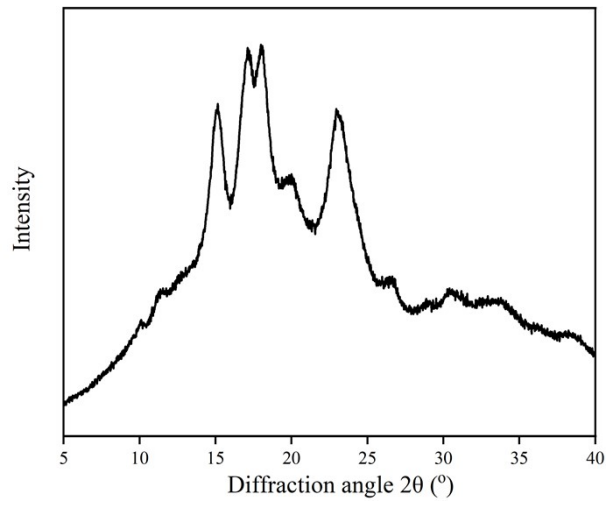

**Fig. S2.** The XRD pattern of native corn starch.
